# Supplementary material for: A Physiological Approach to Explore How Thioredoxin–Glutathione Reductase (TGR) and Peroxiredoxin (Prx) Eliminate H2O2 in Cysticerci of Taenia
Source: MDPI journal article supplement (doi:10.3390/antiox13040444), 2024-04-10
Supplement: s1 [file s1]

# A physiological approach to explore how thioredoxin-glutathione reductase (TGR) and peroxiredoxin (Prx) eliminate H<sub>2</sub>O<sub>2</sub> in cysticerci of *Taenia*

Alberto Guevara-Flores<sup>1</sup>, Gabriela Nava-Balderas<sup>\*2</sup>, José de Jesús Martínez-González<sup>1</sup>, César Vásquez-Lima<sup>1</sup>, Juan Luis Rendón<sup>1</sup> and Irene Patricia del Arenal Mena<sup>\*1</sup>

<sup>1</sup>Departamento de Bioquímica, Facultad de Medicina, Universidad Nacional Autónoma de México (UNAM). Apartado Postal 70-159, 04510 Mexico City, Mexico

<sup>2</sup>Departamento de Microbiología y Parasitología, Facultad de Medicina, Universidad Nacional Autónoma de México (UNAM). Apartado Postal 70-159, 04510 Mexico City, Mexico

\* Correspondence: gabrielanavab@comunidad.unam.mx (G.N-B) darenal@bq.unam.mx (I.P.d.A).

## Supplementary Materials:

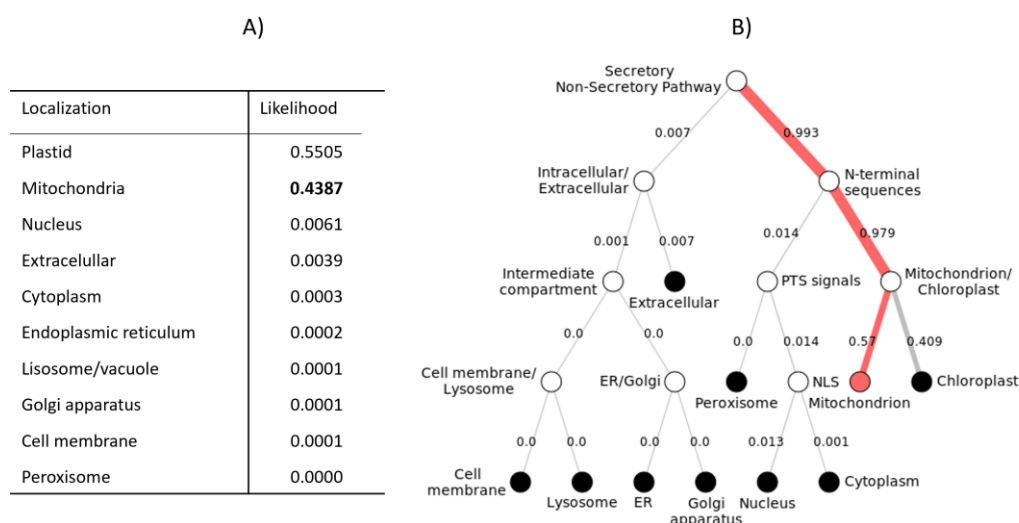

**Figure S1. Prediction of *TsPrx3* subcellular localization.** Peptide (–MQRLMPHLRPKLFASL–SASSHIAPTFQSR–) of *TsPrx3* was analyzed using DeepLoc-1.0. (A) Table of predicted subcellular localization. (B) Hierarchical tree.

**Table S1. Kinetic constants for *TsTGR* and *TcTGR* toward recombinant Trx from *T. solium* and Trx from *T. crassiceps*.**

| Enzyme       | Oxidizing substrate | $K_m$                         | $k_{cat}$          | $k_{cat}/K_m$                      | Reference  |
|--------------|---------------------|-------------------------------|--------------------|------------------------------------|------------|
|              |                     | (M)                           | (s <sup>-1</sup> ) | (M <sup>-1</sup> s <sup>-1</sup> ) |            |
| <i>TcTGR</i> | <i>TsTrx</i>        | $41.5 \pm 5.3 \times 10^{-6}$ | $53.3 \pm 4.0$     | $1.2 \times 10^6$                  | This work* |
| <i>TsTGR</i> | <i>TsTrx</i>        | $27.4 \pm 3.5 \times 10^{-6}$ | $20.0 \pm 1.2$     | $0.7 \times 10^6$                  | [38]       |
| <i>TcTGR</i> | <i>TcTrx</i>        | $3.1 \pm 1.0 \times 10^{-6}$  | 10                 | $3.2 \times 10^6$                  | [43]       |

\*Data obtained using 100  $\mu$ M NADPH (reducing substrate), 56 nM *TcTGR*, 50  $\mu$ M insulin, and increasing concentrations of Trx from *T. solium* at 25°C and pH 7.8. Data are the means of three independent measurements obtained from the Michaelis-Menten equation.

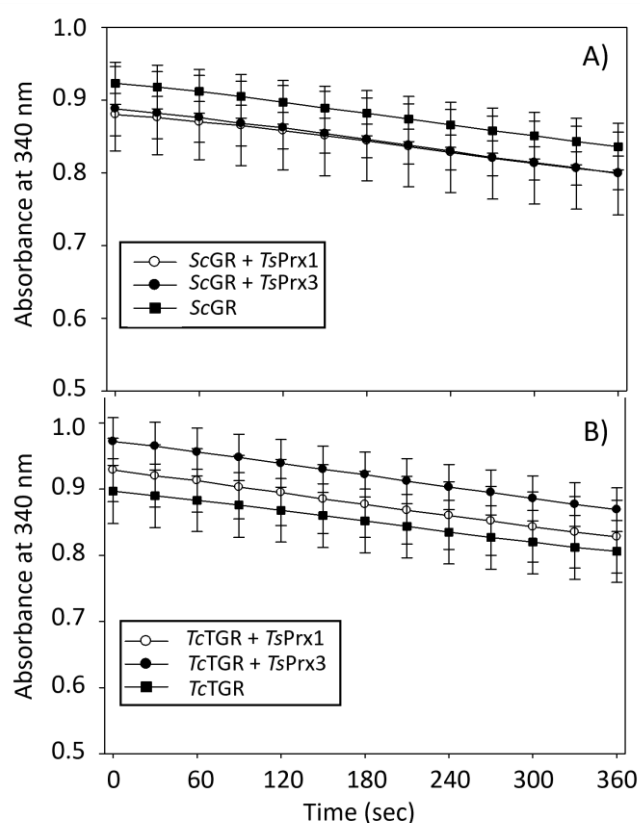

**Figure S2.** Activity of *TsPrx1* and *TsPrx3* was determined with the glutathione system. Assays containing 1 mM GSH, 150  $\mu$ M NADPH, 1.25  $\mu$ M *TsPrx1* (circles) or *TsPrx3* (filled circles) were incubated with: (A) 8 nM *ScGR* (squares) or (B) 11.2 nM *TcTGR* (squares) in 100 mM Tris/HCl (pH 7.8) 1 mM EDTA for 5 min to allow the reaction to stabilize.  $\text{H}_2\text{O}_2$  (50  $\mu$ M) was added to initiate the reaction that was monitored for 6 min at 25°C.

**Table S2.** Kinetic constants for recombinant *TsPrx1* and *TsPrx3* toward hydroperoxides in the presence of *TsTrx*.

| Enzyme        | Reducing Substrate | Oxidizing substrates         |                                 |                                                     |                               |                                 |                                                     |
|---------------|--------------------|------------------------------|---------------------------------|-----------------------------------------------------|-------------------------------|---------------------------------|-----------------------------------------------------|
|               |                    | Cumene hydroperoxide         |                                 |                                                     | <i>t</i> -butylhydroperoxide  |                                 |                                                     |
|               |                    | $K_m$<br>(M)                 | $k_{cat}$<br>(s <sup>-1</sup> ) | $k_{cat}/K_m$<br>(M <sup>-1</sup> s <sup>-1</sup> ) | $K_m$<br>(M)                  | $k_{cat}$<br>(s <sup>-1</sup> ) | $k_{cat}/K_m$<br>(M <sup>-1</sup> s <sup>-1</sup> ) |
| <i>TsPrx1</i> | <i>TsTrx</i>       | $5.1 \pm 0.9 \times 10^{-6}$ | $21 \pm 2.0 \times 10^{-3}$     | $0.4 \times 10^4$                                   | $18.1 \pm 6.8 \times 10^{-6}$ | $6.8 \pm 0.8 \times 10^{-3}$    | $0.3 \times 10^3$                                   |
| <i>TsPrx3</i> | <i>TsTrx</i>       | $6.3 \pm 2.6 \times 10^{-6}$ | $24 \pm 5.0 \times 10^{-3}$     | $0.3 \times 10^4$                                   | $8.4 \pm 2.7 \times 10^{-6}$  | $14.0 \pm 1.0 \times 10^{-3}$   | $1.6 \times 10^3$                                   |

Measurements obtained as described under Materials and Methods at 25°C and pH 7.8. Data are from three independent measurements.

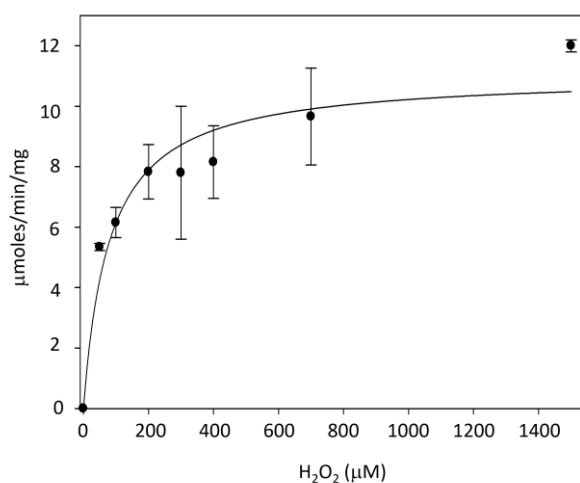

**Figure S3.** Thioresdoxin peroxidase activity of *TcTGR*. H<sub>2</sub>O<sub>2</sub> reduction was measured in the absence of *TsPrx1*. Measurements obtained as described under Materials and Methods. Data are the means of three independent measurements.

## References

38. Nava, G.; Maldonado, G.; Plancarte, A. Cloning, expression, purification, and kinetic characterization of mitochondrial thioredoxin (TsTrx2), cytosolic thioredoxin (TsTrx1), and glutaredoxin (TsGrx1) from *Taenia solium*. *Parasitol Res.* **2019**, *118*, 1785-1797. <https://doi.org/10.1007/s00436-019-06336-4>
43. Martínez-González, J.J.; Guevara-Flores, A.; Rendón, J.L.; Sosa-Peinado, A.; Del Arenal Mena, I.P. Purification and characterization of *Taenia crassiceps* cysticerci thioredoxin: insight into thioredoxin-glutathione-reductase (TGR) substrate recognition. *Parasitol Int.* **2015**, *64*, 194-201. <https://doi.org/10.1016/j.parint.2014.12.004>
